# Supplementary material for: An Investigation into the Frequency of Anemia and the Relationship between Pregnant Women's Educational Attainment and Anemia in Meerut City
Source: Research Square preprint supplement (doi:10.21203/rs.3.rs-6947657/v1), 2025-06-30
Supplement: Supplementary file 1 [file 1732fb55e661858de19eb317.pdf]

# Pregnant Women's Questionnaire

My name is **Prem Kumar**, a Ph.D. research scholar at Swami Vivekanand Subharti University, Meerut, Uttar Pradesh. This study is being conducted to understand the prevalence of anemia and its relation with education and economic status among pregnant women.

You have been selected to participate in this survey, which will take approximately **25–30 minutes**. Your responses will remain strictly confidential and will only be used for academic research. Participation is **completely voluntary**. You are free to skip any question or withdraw from the interview at any time without any consequences.

If you have any questions about the study, please feel free to ask.

नमस्ते, मेरा नाम **Prem Kumar** है। मैं **स्वामी विवेकानंद सुभारती विश्वविद्यालय, मेरठ (उत्तर प्रदेश)** में पीएच.डी. का छात्र हूँ। मेरा यह शोध कार्य गर्भवती महिलाओं में एनीमिया की स्थिति और उसके शैक्षिक एवं आर्थिक कारणों को समझने के उद्देश्य से किया जा रहा है।

इस सर्वेक्षण में आपसे कुछ स्वास्थ्य संबंधी जानकारी ली जाएगी, जिसमें लगभग **25–30 मिनट** का समय लगेगा। आपकी दी गई सभी जानकारी को गोपनीय रखा जाएगा और केवल इस शोध के लिए उपयोग की जाएगी। इस सर्वेक्षण में भाग लेना पूरी तरह से **स्वैच्छिक (voluntary)** है। यदि आप किसी भी सवाल का उत्तर नहीं देना चाहती हैं या सर्वे को कभी भी रोकना चाहें, तो आप ऐसा कर सकती हैं—इसका आपके ऊपर कोई असर नहीं पड़ेगा।

यदि आपको इस अध्ययन के बारे में कोई प्रश्न हैं, तो आप मुझसे पूछ सकती हैं।

My name is **Prem Kumar**, a Ph.D. research scholar at Swami Vivekanand Subharti University, Meerut. This study is being conducted to understand the prevalence of anemia and its relation with education and economic status among pregnant women.

You have been selected to participate in this survey, which will take approximately **25–30 minutes**. Your responses will remain strictly confidential and will only be used for academic research. Participation is **completely voluntary**. You are free to skip any question or withdraw from the interview at any time without any consequences.

If you have any questions about the study, please feel free to ask.

---

\* Indicates required question

1. Consent :Do you agree to participate in this survey? क्या आप इस सर्वेक्षण में भाग लेने के लिए अपनी सहमति देती हैं? \*

*Mark only one oval.*

- ☐ Yes हाँ, मैं सहमत हूँ
- ☐ No नहीं, मैं भाग नहीं लेना चाहती

2. A-Name of Interviewer साक्षात्कारकर्ता का नाम \*

---

3. B- Mobile number of Interviewer साक्षात्कारकर्ता का मोबाइल नंबर \*

---

4. C. Name of district \*

⌵ Dropdown

*Mark only one oval.*

- ☐ Meerut

5. D. Name of PHC \*

---

6. E. Name of Respondent \*

---

7. F. Contact number of respondent \*

---

---

---

---

---

8. G-Name of Husband

---

### Section 1 Demographic information

9. 1. What is your age (In Year) आपकी आयु क्या है (वर्ष में) \*

---

10. 2. What is your place of residence? आपका निवास स्थान क्या है? \*

*Mark only one oval.*

- ☐ Urban
- ☐ Semi-urban
- ☐ Rural

11. **3.what is your religion ?** आपका धर्म क्या है? \*

Mark only one oval.

- ☐ Hindu
- ☐ Muslim
- ☐ Sikh
- ☐ Cristian
- ☐ Other

12. **4. Do you belong to a scheduled caste, a scheduled tribe, other backward class, or none of these?** क्या आप अनुसूचित जाति , अनुसूचित जनजाति , अन्य पिछड़े वर्ग से हैं या इनमें से कोई नहीं हैं ?

Mark only one oval.

- ☐ Scheduled Caste
- ☐ Scheduled Tribe
- ☐ OBC
- ☐ General
- ☐ Other: \_\_\_\_\_

**Section:- 2 Educational information status**13. **5. What is the highest level of education you have completed?** आपने उच्चतम स्तर की कौन सी शिक्षा पूरी की है? \*

Mark only one oval.

- ☐ No formal education
- ☐ Primary school
- ☐ Secondary school
- ☐ College/university
- ☐ Postgraduate

14. **6. Do you read a newspaper or magazine at least once a week(1), less than once a week(2) or not at all(3)?** क्या आप अखबार या पत्रिका का लगभग सप्ताह में कम से कम एक बार(1), सप्ताह में एक बार से कम (2)या कभी नहीं (3) पढ़ती हैं ?

*Mark only one oval.*

- ☐ 1  
☐ 2  
☐ 3  
☐ Other: \_\_\_\_\_

15. **7. Do you watch television at least once a week, less than once a week or not at all?** क्या आप रेडियो/टीवी लगभग सप्ताह में कम से कम एक बार, सप्ताह में एक बार से कम या कभी नहीं सुनती/देखती/?

*Mark only one oval.*

- ☐ 1  
☐ 2  
☐ 3  
☐ Other: \_\_\_\_\_

16. **8. Do you usually go to a cinema hall or theatre to see a movie at least once a month?** क्या आप महीने में एक बार सिनेमा या थियेटर पिक्चर देखने जाते हैं?

*Check all that apply.*

- ☐ Yes  
☐ No

**Section:-3 Socioeconomic Status**

17. **9. What type of house do you live in?** आप किस प्रकार के घर में रहते हैं? \*

*Mark only one oval.*

- ☐ Owned house
- ☐ Rented house
- ☐ Temporary shelter

18. **10. How many people live in your household?** आपके घर में कितने लोग रहते हैं \*

*Mark only one oval.*

- ☐ 1-2
- ☐ 3-5
- ☐ More than 5

19. **11. Are you doing job?** क्या आप नौकरी कर रहे हैं? \*

*Mark only one oval.*

- ☐ House wife
- ☐ Private employee
- ☐ Government employee
- ☐ Self-employed
- ☐ Not now after pregnancy

20. **12. What is your monthly household income?** आपकी मासिक घरेलू आय क्या है? \*

Mark only one oval.

- ☐ ≤ ₹12500 or less than
- ☐ ₹25000–₹50,000
- ☐ ₹50,000–₹150,000
- ☐ ₹150,000–₹300,000
- ☐ above ₹ 300000

21. **13. Access to Basic Amenities (tick all that apply):** बुनियादी सुविधाओं तक पहुंच (जो लागू हो उस पर निशान लगाएं) \*

Check all that apply.

- ☐ Electricity
- ☐ Safe drinking water
- ☐ Sanitation facilities
- ☐ Transportation (Car)
- ☐ TV
- ☐ AC
- ☐ Computer/Laptop

#### **Section:-4 Antenatal Care information**

22. **14(i). Obstetrical score** प्रसूति स्कोर (GPLA)

G Gravida (कुल गर्व धारण की संख्या)

---

23. **14(ii) P – Pariti** ( कुल प्रसव की संख्या)

---

24. **14 (iii) L - Live Children** (कुल जीवित बच्चे )

---

25. **14 (iv) A – abortion** (कुल गर्भपात की संख्या)

---

26. **15. Please tell me the age of the youngest of your living children**  
? कृपया मुझे अपने जीवित बच्चों में सबसे छोटे बच्चे की उम्र बताएं। (In year)

---

27. **16. Gestational Age (weeks): गर्भकालीन आयु (सप्ताह): \***

*Mark only one oval.*

- ☐ Less than 12 weeks
- ☐ 12–24 weeks
- ☐ 25–36 weeks
- ☐ 37 weeks and above

28. **17. At how many weeks did you start your first ANC visit for this pregnancy?** आपने इस गर्भावस्था के लिए अपनी पहली एएनसी यात्रा कितने सप्ताह में शुरू की थी? \*

*Mark only one oval.*

- ☐ Before 12 weeks
- ☐ 12–20 weeks
- ☐ 21–28 weeks
- ☐ After 28 weeks
- ☐ Did not attend



29. **18. How many ANC visits have you attended so far for this pregnancy?** इस गर्भावस्था के दौरान आपने अब तक कितनी एएनसी विजिट में भाग लिया है? \*

*Mark only one oval.*

- ☐ None
- ☐ 1-2
- ☐ 3
- ☐ 4
- ☐ More than 4

30. **19. Where do you receive your ANC services?** आप अपनी एएनसी सेवाएँ कहाँ से प्राप्त करते हैं? \*

*Mark only one oval.*

- ☐ Government hospital
- ☐ Private hospital
- ☐ Health center/clinic
- ☐ Traditional birth attendant

31. **20 . Did you experience any barriers to attending ANC?** क्या आपको एएनसी में भाग लेने में किसी बाधा का अनुभव हुआ? \*

*Mark only one oval.*

- ☐ Yes
- ☐ No

32. **21 . If yes, what were the main barriers? (Check all that apply)** यदि हाँ, तो मुख्य बाधाएँ क्या थीं? (लागू होने वाले सभी को जाँचे)

*Check all that apply.*

- ☐ Distance to the health facility
- ☐ Cost of services
- ☐ Lack of transportation
- ☐ Cultural beliefs
- ☐ Work or household responsibilities
- ☐ NA

33. **22. What factors influenced your decision to attend ANC? (Check all that apply) ?** एएनसी में भाग लेने के आपके निर्णय को किन कारकों ने प्रभावित किया? (लागू होने वाले सभी को जाँचे)? \*

*Mark only one oval.*

- ☐ Advice from family/friends
- ☐ Previous pregnancy complications
- ☐ Doctor/midwife recommendation
- ☐ Awareness of ANC benefits
- ☐ None of above

### **Section:-5 Nutrition Habit**

#### Nutrition

34. **23. How many time meals do you usually eat per day?** आप आमतौर पर प्रति दिन कितनी बार भोजन करते हैं? \*

*Mark only one oval.*

- ☐ One
- ☐ Two
- ☐ Three or more

35. **24. Food Accessibility: भोजन की उपलब्धता: \****Mark only one oval.*

- ☐ Readily available (आसानी से उपलब्ध)
- ☐ Limited due to cost (Low Income ) लागत के कारण सीमित (कम आय)
- ☐ Limited due to living location (निवास स्थान के कारण सीमित)

36. **25. Do you include iron-rich foods (e.g., green leafy vegetables, meat, beans) in your diet? क्या आप अपने आहार में आयरन युक्त खाद्य पदार्थ (जैसे, हरी पत्तेदार सब्जियाँ, मांस, बीन्स) शामिल करते हैं? \****Mark only one oval.*

- ☐ Daily
- ☐ 2-3 times/week
- ☐ Rarely

37. **26(i). How often do you eat the following food groups during pregnancy? (Mark the appropriate option) ?गर्भावस्था के दौरान आप निम्नलिखित खाद्य समूहों को कितनी बार खाती हैं? (उचित विकल्प को ✓ चिह्नित करें) \***

Food Group- Daily, 2-3 times/week, Occasionally, Never

1-Fruits, 2-Vegetables, 3-Dairy products, 4-Protein (meat, fish, eggs, beans), 5-Whole grains (rice, bread, pasta)

**(i) Fruits***Mark only one oval.*

- ☐ Daily
- ☐ 2-3 times/week
- ☐ Occasionally
- ☐ Never

38. **26(ii). Vegetables \***

*Mark only one oval.*

- ☐ Daily
- ☐ 2-3 times/week
- ☐ Occasionally
- ☐ Never

39. **26(iii). Dairy products \***

*Mark only one oval.*

- ☐ Daily
- ☐ 2-3 times/week
- ☐ Occasionally
- ☐ Never

40. **26(iv). Protein (meat, fish, eggs) \***

*Mark only one oval.*

- ☐ Daily
- ☐ 2-3 times/week
- ☐ Occasionally
- ☐ Never

41. **26 (v). Junk Food (Noodles, bread, pasta) \***

*Mark only one oval.*

- ☐ Daily
- ☐ 2-3 times/week
- ☐ Occasionally
- ☐ Never

42. **26 (vi) Do you face financial constraints in purchasing nutritious food? क्या आपको पौष्टिक भोजन खरीदने में वित्तीय बाधाओं का सामना करना पड़ता है? \***

*Mark only one oval.*

- ☐ Yes
- ☐ No

43. **27 (i). Are you aware of the importance of iron supplementation during pregnancy? क्या आप गर्भावस्था के दौरान आयरन अनुपूरण के महत्व से अवगत हैं? \***

*Mark only one oval.*

- ☐ Yes
- ☐ No

44. **27 (ii). If yes, which supplements do you take? (Check all that apply) यदि हां, तो आप कौन से सप्लीमेंट लेते हैं? (लागू होने वाले सभी को जाँचे) \***

*Check all that apply.*

- ☐ a) Iron
- ☐ b) Folic acid
- ☐ c) Calcium
- ☐ d) Vitamin D

45. **28 (i). how are you taking Iron /FA? क्या आप आयरन/एफए ले रहे हैं? \***

*Mark only one oval.*

- ☐ a) Daily
- ☐ b) Alternate day
- ☐ c) Once in a week
- ☐ Sometimes
- ☐ Other: \_\_\_\_\_

46. **28 (ii). If not taking daily why? यदि प्रतिदिन नहीं ले रहे तो क्यों?**

\_\_\_\_\_

47. **28 (iii). If yes than for how long (month/days) you are taking Iron Folic tablets आप कितने समय (महीने/दिन) से आयरन फोलिक टेबलेट ले रहे हैं \***

\_\_\_\_\_

48. **29 . How many IFA tablets are you taking daily? आप प्रतिदिन कितनी IFA टेबलेट ले रहे हैं? \***

*Mark only one oval.*

- ☐ 1
- ☐ 2
- ☐ 3 or more

49. 30. **From where you have received Iron/FA?** आपने आयरन/एफए कहाँ से प्राप्त किया है? \*

*Check all that apply.*

- ☐ a) ANM  
☐ b) ASHA  
☐ c) Health Sub Center/ PHC / CHC  
☐ Self

### **Section 6: Lifestyle and Nutrition Awareness**

50. 31. **Do you drink at least 8 glasses of water per day?** क्या आप प्रतिदिन कम से कम 8 गिलास पानी पीते हैं? \*

*Mark only one oval.*

- ☐ Yes  
☐ No

51. 32. **Are you aware of the importance of a balanced diet during pregnancy?** क्या आप गर्भावस्था के दौरान संतुलित आहार के महत्व से अवगत हैं? If yes Specify or No

*Mark only one oval.*

- ☐ Yes  
☐ No

52. **33 (i). Access to Health/Nutrition Education Programs:** स्वास्थ्य/पोषण शिक्षा कार्यक्रमों तक पहुंच:

*Mark only one oval.*

- ☐ Yes
- ☐ No

53. **33 (ii) If yes, what near the learning point ever there** यदि हां, तो वहां सीखने का बिंदु क्या है
- 

54. **34. Do you follow a special diet during pregnancy?** क्या आप गर्भावस्था के दौरान विशेष आहार का पालन करती हैं?

*Mark only one oval.*

- ☐ Yes
- ☐ No

55. **35. How would you describe your salt intake?** आप अपने नमक सेवन का वर्णन कैसे करेंगे?

*Mark only one oval.*

- ☐ High
- ☐ Moderate
- ☐ Low



56. **36 (i) . Do you engage in regular physical activity?** क्या आप नियमित शारीरिक गतिविधि में संलग्न हैं? (हां/नहीं, कृपया प्रकार और अवधि बताएं)

*Mark only one oval.*

☐ Yes

☐ No

57. **36 (ii) . If Yes than please specify activity..... & activity duration.....**

---

58. **37 (i). Do you consume caffeine? specify frequency) \***

क्या आप कैफीन का सेवन करते हैं? (हां/नहीं, आवृत्ति निर्दिष्ट करें)

*Mark only one oval.*

☐ Yes

☐ No

59. **37 (ii) If yes than specify frequency in a day** यदि हाँ तो प्रति दिन आवृत्ति बताएं

---

### **Section :-7 Hemoglobin & Lab Tests**

60. **38 (i) Have you undergone an Hb test during this pregnancy?** क्या आपने इस गर्भावस्था के दौरान एचबी परीक्षण कराया है?

*Mark only one oval.*

☐ Yes

☐ No

61. **38 (ii).** if yes, at what gestational week was when your recent hemoglobin test conducted? यदि हाँ, तो आपका हाल ही में हीमोग्लोबिन परीक्षण किस गर्भकालीन सप्ताह में किया गया था? \*

*Mark only one oval.*

- ☐ First trimester (0-12 weeks)
- ☐ Second trimester (13-26 weeks)
- ☐ Third trimester (27+ weeks)

62. **38 (iii).** What was your hemoglobin level at your last test (if known)? आपके अंतिम परीक्षण में आपका हीमोग्लोबिन स्तर क्या था (यदि ज्ञात हो)? \*

*Mark only one oval.*

- ☐ Below 7 g/dL (Severe anemia)
- ☐ 7 - 9.9 g/dL (Moderate anemia)
- ☐ 10-10.9 g/dL (Mild anemia)
- ☐ 11+ g/dL (Normal)
- ☐ Not sure

63. **38 (iv) If No, what are the reasons for not getting a hemoglobin test?** यदि नहीं, तो हीमोग्लोबिन परीक्षण न कराने के क्या कारण हैं?

*Check all that apply.*

- ☐ Lack of awareness about the test
- ☐ Cost concerns
- ☐ Lack of access to healthcare facilities
- ☐ No recommendation from a healthcare provider
- ☐ NA

64. **39. Do you experience any of the following symptoms? (Check all that apply)** क्या आप निम्नलिखित लक्षणों में से किसी का अनुभव करते हैं? (लागू होने वाले सभी को जाँचे)

*Check all that apply.*

- ☐ a) Fatigue (थकान)
- ☐ b) Dizziness ( चक्कर आना)
- ☐ c) Pale skin (पीली त्वचा)
- ☐ d) Shortness of breath ( सांस की तकलीफ)
- ☐ e) Rapid heartbeat (तेज़ दिल की धड़कन)
- ☐ f) Swelling in feet (पैरों में सूजन )
- ☐ None

65. **40. Do you experience any of the following symptoms?** क्या आप निम्नलिखित लक्षणों में से किसी का अनुभव करते हैं? \*

*Check all that apply.*

- ☐ Mild painful Vaginal bleeding
- ☐ Moderate painful Vaginal bleeding
- ☐ Heavy painful vaginal bleeding
- ☐ Dark brown color bleeding
- ☐ None of above

66. **41. Did you experience any of following sign during your past postpartum period** \*

? क्या आपको अपनी पिछली प्रसवोत्तर अवधि के दौरान निम्नलिखित में से किसी भी लक्षण का अनुभव हुआ था?

*Mark only one oval.*

- ☐ Heavy bleeding
- ☐ Moderate bleeding
- ☐ Light bleeding
- ☐ None of above

67. **42. Please ask regarding awareness of anemia and its Causes: कृपया एनीमिया और \*  
इसके कारणों के बारे में जागरूकता के बारे में पूछें**

*Mark only one oval.*

- ☐ High  
☐ Moderate  
☐ Low

### **Section : 8 Blood Pressure Monitoring & Lifestyle**

68. **43. How often is your blood pressure checked during pregnancy? गर्भवस्था के  
दौरान आपका रक्तचाप कितनी बार जांचा जाता है?**

*Mark only one oval.*

- ☐ Once a month  
☐ Twice a month  
☐ Weekly  
☐ Daily  
☐ During ANC check up  
☐ None of above

69. **44. What was your most recent blood pressure reading? (/ mmHg) आपका सबसे हालिया रक्तचाप माप क्या था? (/ mmHg)**

⌵ Dropdown

*Mark only one oval.*

- ☐ Low  
☐ Narmal  
☐ High

70. **45 .Do you experience symptoms such as headaches, dizziness, blurred vision, or swelling?** क्या आप सिरदर्द, चक्कर आना, धुंधली दृष्टि या सूजन जैसे लक्षणों का अनुभव करते हैं?

*Mark only one oval.*

☐ Yes

☐ No

### **Section 9 : Stress and Well-being**

71. **46 (i). Do you experience high levels of stress during pregnancy?** (Yes/No) क्या आप गर्भावस्था के दौरान उच्च स्तर के तनाव का अनुभव करती हैं? (हां नहीं)

*Mark only one oval.*

☐ Yes

☐ No

72. **46 (ii). If yes than what do you feel**

---

73. **47. How do you manage stress?** आप तनाव का प्रबंधन कैसे करते हैं? \*

*Check all that apply.*

- ☐ Meditation/Yoga
- ☐ Exercise
- ☐ Talking to family/friends
- ☐ Only walking
- ☐ Other

74. **48. Do you get at least 7-8 hours of sleep per night?** क्या आप प्रति रात कम से कम 7-8 घंटे की नींद लेते हैं?

*Mark only one oval.*

☐ Yes

☐ No

### **Section 10: Social Support**

75. **49 . Who supports you during pregnancy (tick all that apply):** गर्भावस्था के दौरान कौन आपका समर्थन करता है (जो लागू हो उस पर निशान लगाएं):

*Check all that apply.*

☐ Family

☐ Husband

☐ Mother in law

☐ Friends

☐ Community health workers

☐ My parents side family members.....

☐ No support

76. **50 (i). Do you have access to healthcare services in your area?** क्या आपके क्षेत्र में स्वास्थ्य सेवाओं तक पहुंच है?

*Mark only one oval.*

☐ Yes

☐ No

77. **52 (ii). If yes what is available in your area.** यदि हाँ तो आपके क्षेत्र में क्या उपलब्ध है

---

78. **50 (iii). If No, where do you go** यदि नहीं, तो आप कहाँ जाते हैं.

---

79. **51 (i). Any participation in Community Programs for Pregnant Women:** गर्भवती महिलाओं के लिए सामुदायिक कार्यक्रमों में भागीदारी

*Mark only one oval.*

☐ Yes

☐ No

80. **51 (ii). If yes please specify.....**

---

### **Section 11: Impact of Anemia on Quality of Life**

गर्भवती महिलाओं,  
विशेष रूप  
से एनीमिया  
से पीड़ित  
महिलाओं में  
दैनिक गतिविधियों  
को करने  
में कठिनाई  
को हानि  
के स्तर,  
लक्षणों की  
आवृत्ति और  
दैनिक कामकाज  
प्रभावित होने  
की सीमा  
के आधार  
पर हल्के,  
मध्यम और  
गंभीर श्रेणियों  
में वर्गीकृत  
किया जा  
सकता है।

81. **52. Difficulty in Performing Daily Activities:** दैनिक गतिविधियाँ करने में कठिनाई:*Check all that apply.*

☐ 1-Mild Difficulty such as : Climbing stairs without significant pause, Cooking and light cleaning with minor fatigue, Short walks without major exhaustion बिना ज्यादा रुके सीढ़ियाँ चढ़ना, मामूली थकान के साथ खाना बनाना और हल्की सफाई करना, बिना ज्यादा थकावट के थोड़ी देर चलना

☐ 2-Moderate Difficulty such as: Struggling with prolonged standing while cooking, Difficulty walking moderate distances or climbing stairs without frequent pauses, Challenges with attending work full-time due to fatigue खाना बनाते समय लंबे समय तक खड़े रहने की समस्या, मध्यम दूरी तक चलने या बिना रुके सीढ़ियाँ चढ़ने में कठिनाई, थकान के कारण पूरे समय काम पर जाने की चुनौतियाँ

☐ 3- Severe Difficulty such as: Inability to walk without support due to severe weakness, needing assistance for daily hygiene and meal preparation, Confined to bed or requiring hospitalization in extreme cases गंभीर कमजोरी के कारण बिना सहारे के चलने में असमर्थता, दैनिक स्वच्छता और भोजन की तैयारी के लिए सहायता की आवश्यकता, बिस्तर तक ही सीमित रहना या अत्यधिक मामलों में अस्पताल में भर्ती होने की आवश्यकता होना

82. **53. How has anemia affected your ability to work or study?** एनीमिया ने आपकी काम करने या अध्ययन करने की क्षमता को कैसे प्रभावित किया है?*Mark only one oval.*

- ☐ No impact
- ☐ Slightly reduced productivity
- ☐ Moderately reduced productivity
- ☐ Severely reduced productivity or unable to work

83. **54 .Do you find it difficult to attend work or social gatherings due to your health?** क्या आपको अपने स्वास्थ्य के कारण काम या सामाजिक समारोहों में भाग लेने में कठिनाई होती है?*Mark only one oval.*

- ☐ No
- ☐ Rarely
- ☐ Sometimes
- ☐ Frequently



84. **55. Do you feel that anemia has significantly reduced your ability to enjoy daily activities?** क्या आपको लगता है कि एनीमिया ने आपकी दैनिक गतिविधियों का आनंद लेने की क्षमता को काफी कम कर दिया है?

*Mark only one oval.*

- ☐ Not at all बिल्कुल नहीं
- ☐ Slightly थोड़ा
- ☐ Moderately मध्यम रूप से
- ☐ Severely गंभीर रूप से

85. **56. How confident are you in managing your health during pregnancy?** गर्भावस्था के दौरान अपने स्वास्थ्य के प्रबंधन को लेकर आप कितनी आश्वस्त हैं?

*Mark only one oval.*

- ☐ Very confident बहुत आश्वस्त
- ☐ Somewhat confident कुछ हद तक आश्वस्त
- ☐ Not very confident बहुत आश्वस्त नहीं
- ☐ Not confident at all बिल्कुल भी आश्वस्त नहीं

86. **57. Do you have any suggestion to me?** क्या आप मुझे कोई सुझाव देना चाहेंगे?

---

---

---

---

---

This content is neither created nor endorsed by Google.

Google Forms
